# Supplementary material
Source: PubMed Central journal article supplement (PMC8807802)
Supplement: 41422_2021_598_MOESM1_ESM.pdf [file 41422_2021_598_MOESM1_ESM.pdf]

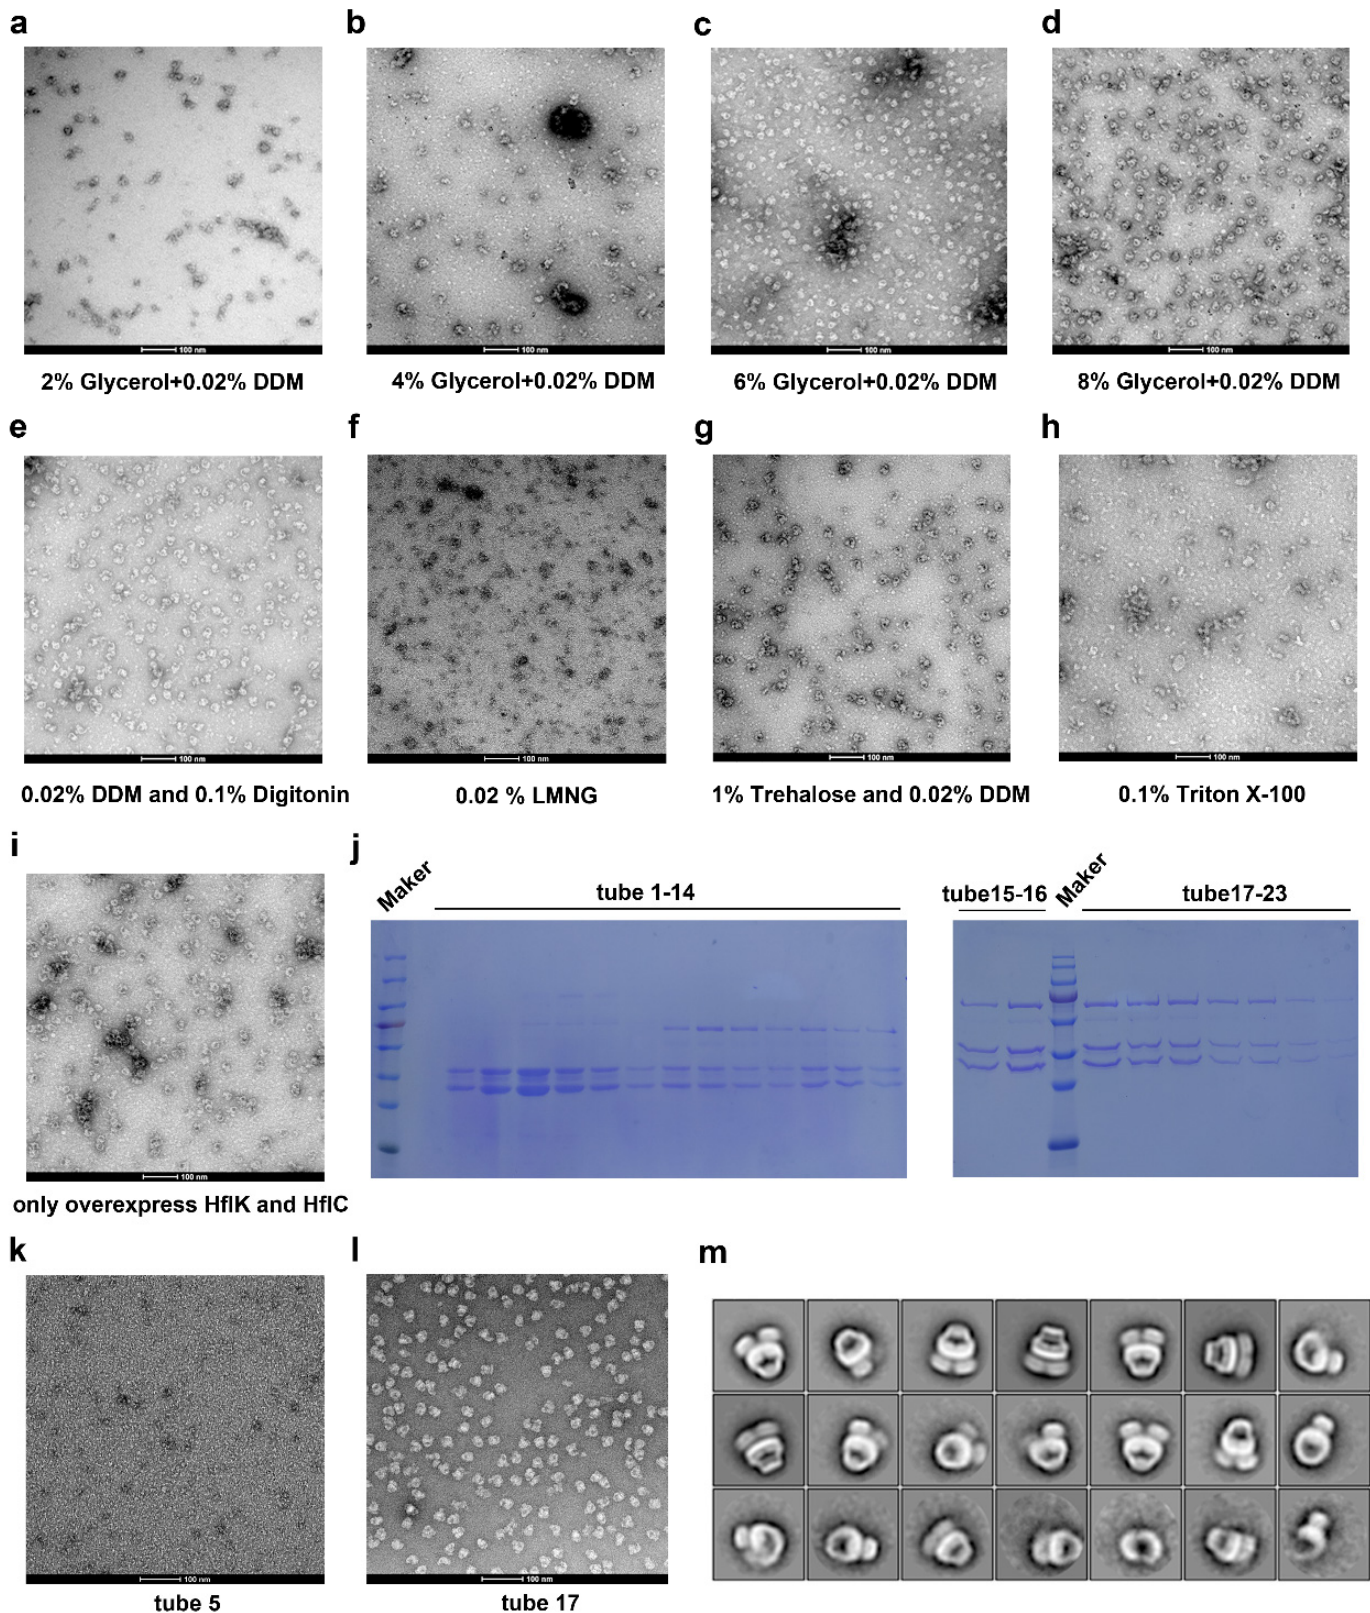

**Figure S1. Purification of the KCF complex.**

**a-h** Negative staining electron microscopy (nsEM) analysis of the KCF samples extracted with different detergents and glycerol in different concentrations. **i** The nsEM analysis of the complex with overexpressed HflK and HflC only. **j** Coomassie brilliant blue stained SDS-PAGE gel shows the distribution of the KCF complex in the glycerol gradient. **k-l** The nsEM analysis of the samples from tube 5 and tube 17 in (j). **m** 2D classification of negatively stained KCF complexes from tube 17.
