# Supplementary material
Source: PubMed Central journal article supplement (PMC8807802)
Supplement: 41422_2021_598_MOESM3_ESM.pdf [file 41422_2021_598_MOESM3_ESM.pdf]

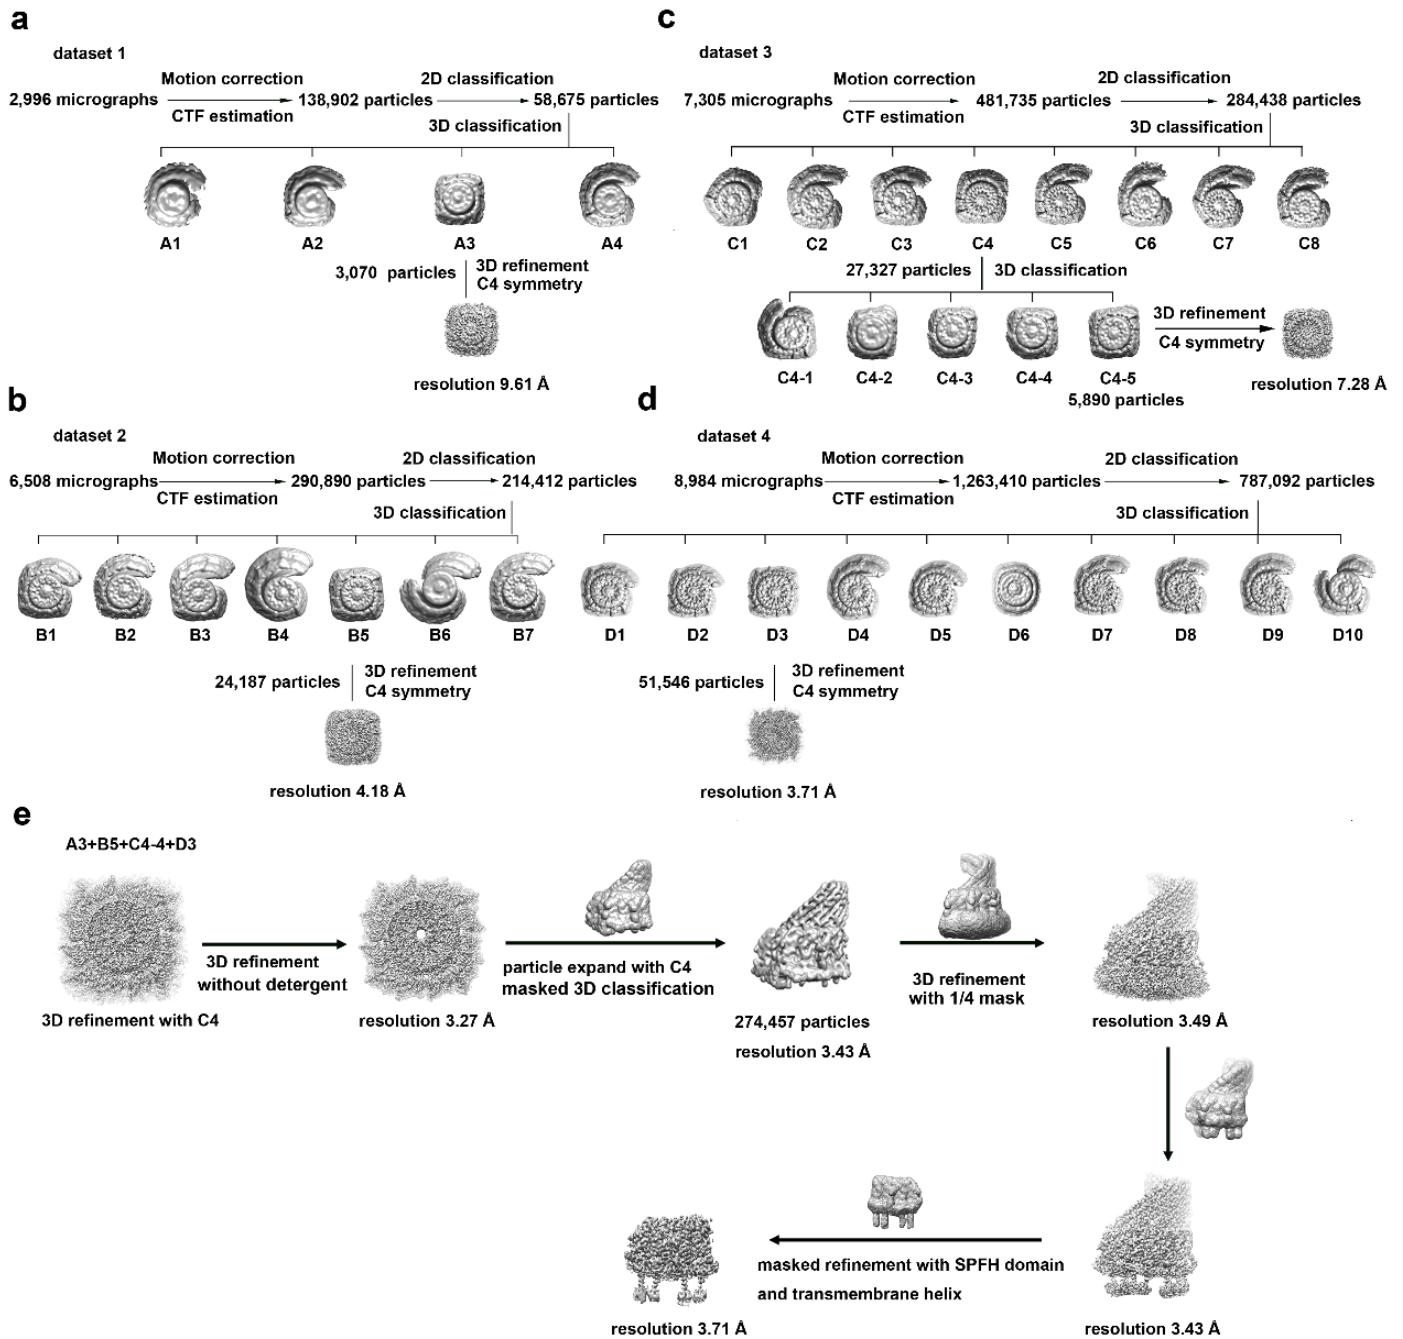

**Figure S3. Cryo-EM image processing of the KCF complex.**

**a-d** The flow chart of image processing for the four cryo-EM data batches. **e** Particles with four embedded FtsH hexamers were pooled for high-resolution refinement with C4 symmetry imposed (see methods for details).
