# Supplementary material
Source: PubMed Central journal article supplement (PMC8807802)
Supplement: 41422_2021_598_MOESM4_ESM.pdf [file 41422_2021_598_MOESM4_ESM.pdf]

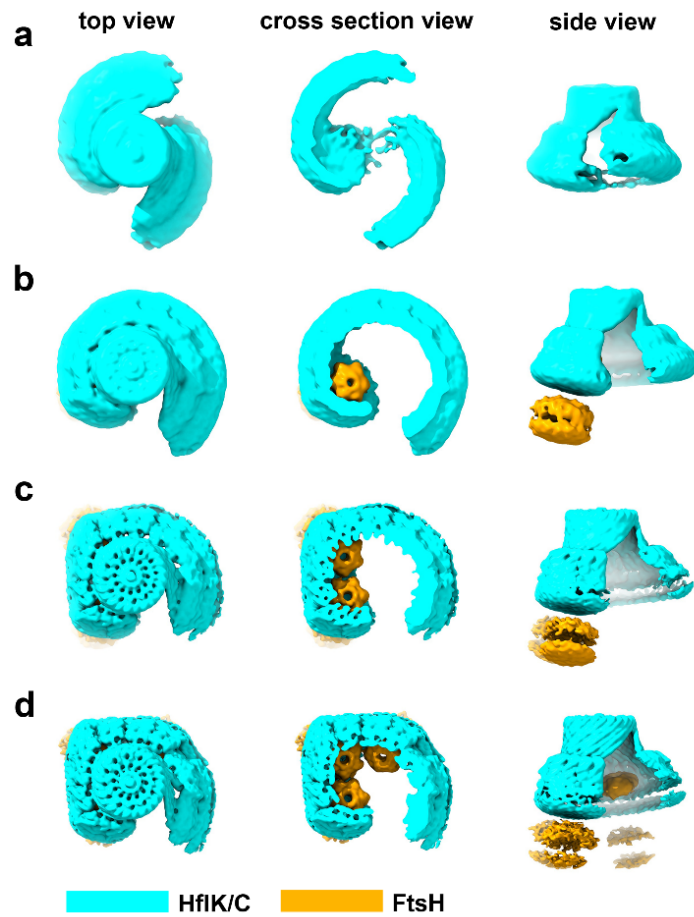

**Figure S4. Purified KCF complexes are heterogenous in conformation and composition.**

**a-d** The cryo-EM maps from 3D classification show differently deformed KCF complexes, with large ruptures on the side. The HflK-HflC cage is colored cyan and FtsH hexamer golden.
