# Supplementary material
Source: PubMed Central journal article supplement (PMC8807802)
Supplement: 41422_2021_598_MOESM5_ESM.pdf [file 41422_2021_598_MOESM5_ESM.pdf]

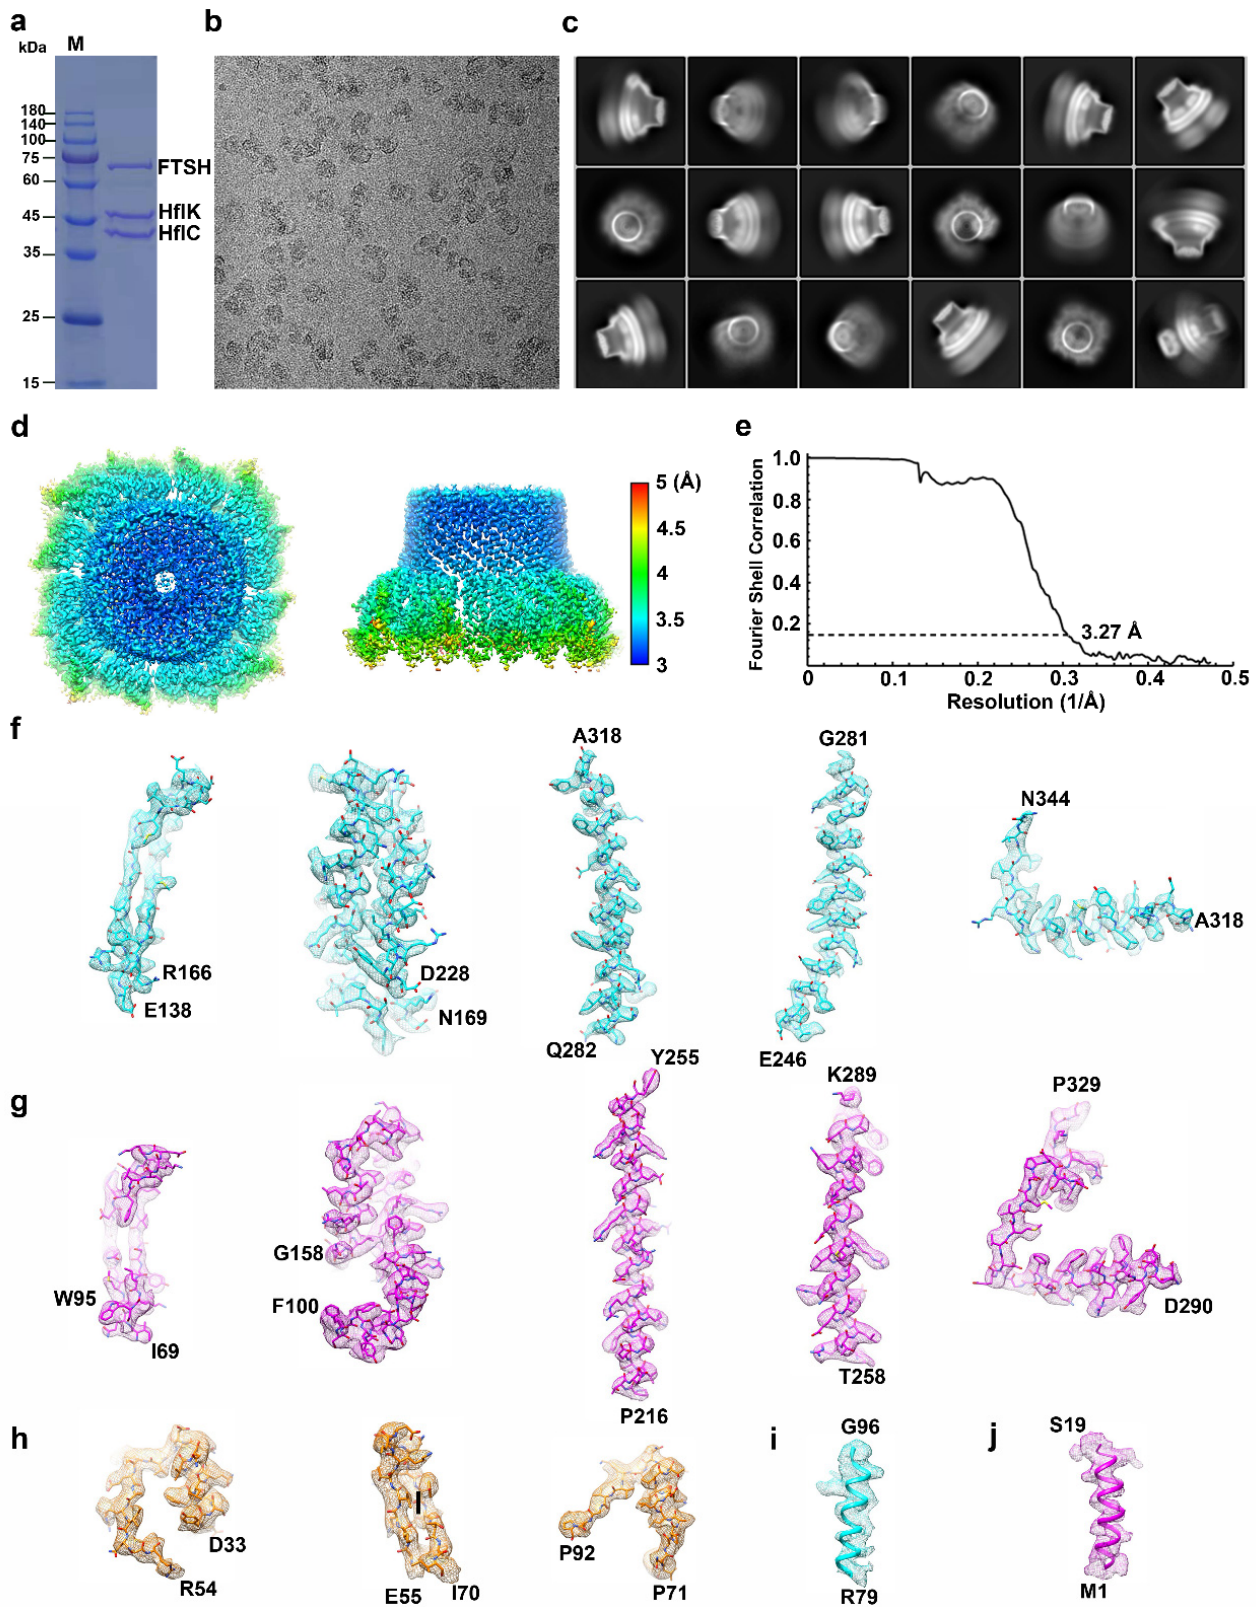

**Figure S5. Resolution estimation of the final density map of the KCF complex.**

**a** Coomassie brilliant blue stained SDS-PAGE gel of the KCF complex used for the cryo-EM analysis. **b** A representative cryo-EM image of the KCF complex. **c** Representative average images of 2D classification. **d** Local resolution estimation of the final cryo-EM map. **e** Fourier shell correlation (FSC) curves of the final map. At FSC gold-standard 0.143 cutoff, the estimated resolution is 3.27 Å. **f-h** Local densities of selected regions of HflK (**f**), HflC (**g**) and FtsH (**h**), superimposed with respective atomic models. **i-j** Local densities of the TM helices of HflK (**i**) and HflC (**j**), with atomic models superimposed.
