# Supplementary material
Source: PubMed Central journal article supplement (PMC8807802)
Supplement: 41422_2021_598_MOESM6_ESM.pdf [file 41422_2021_598_MOESM6_ESM.pdf]

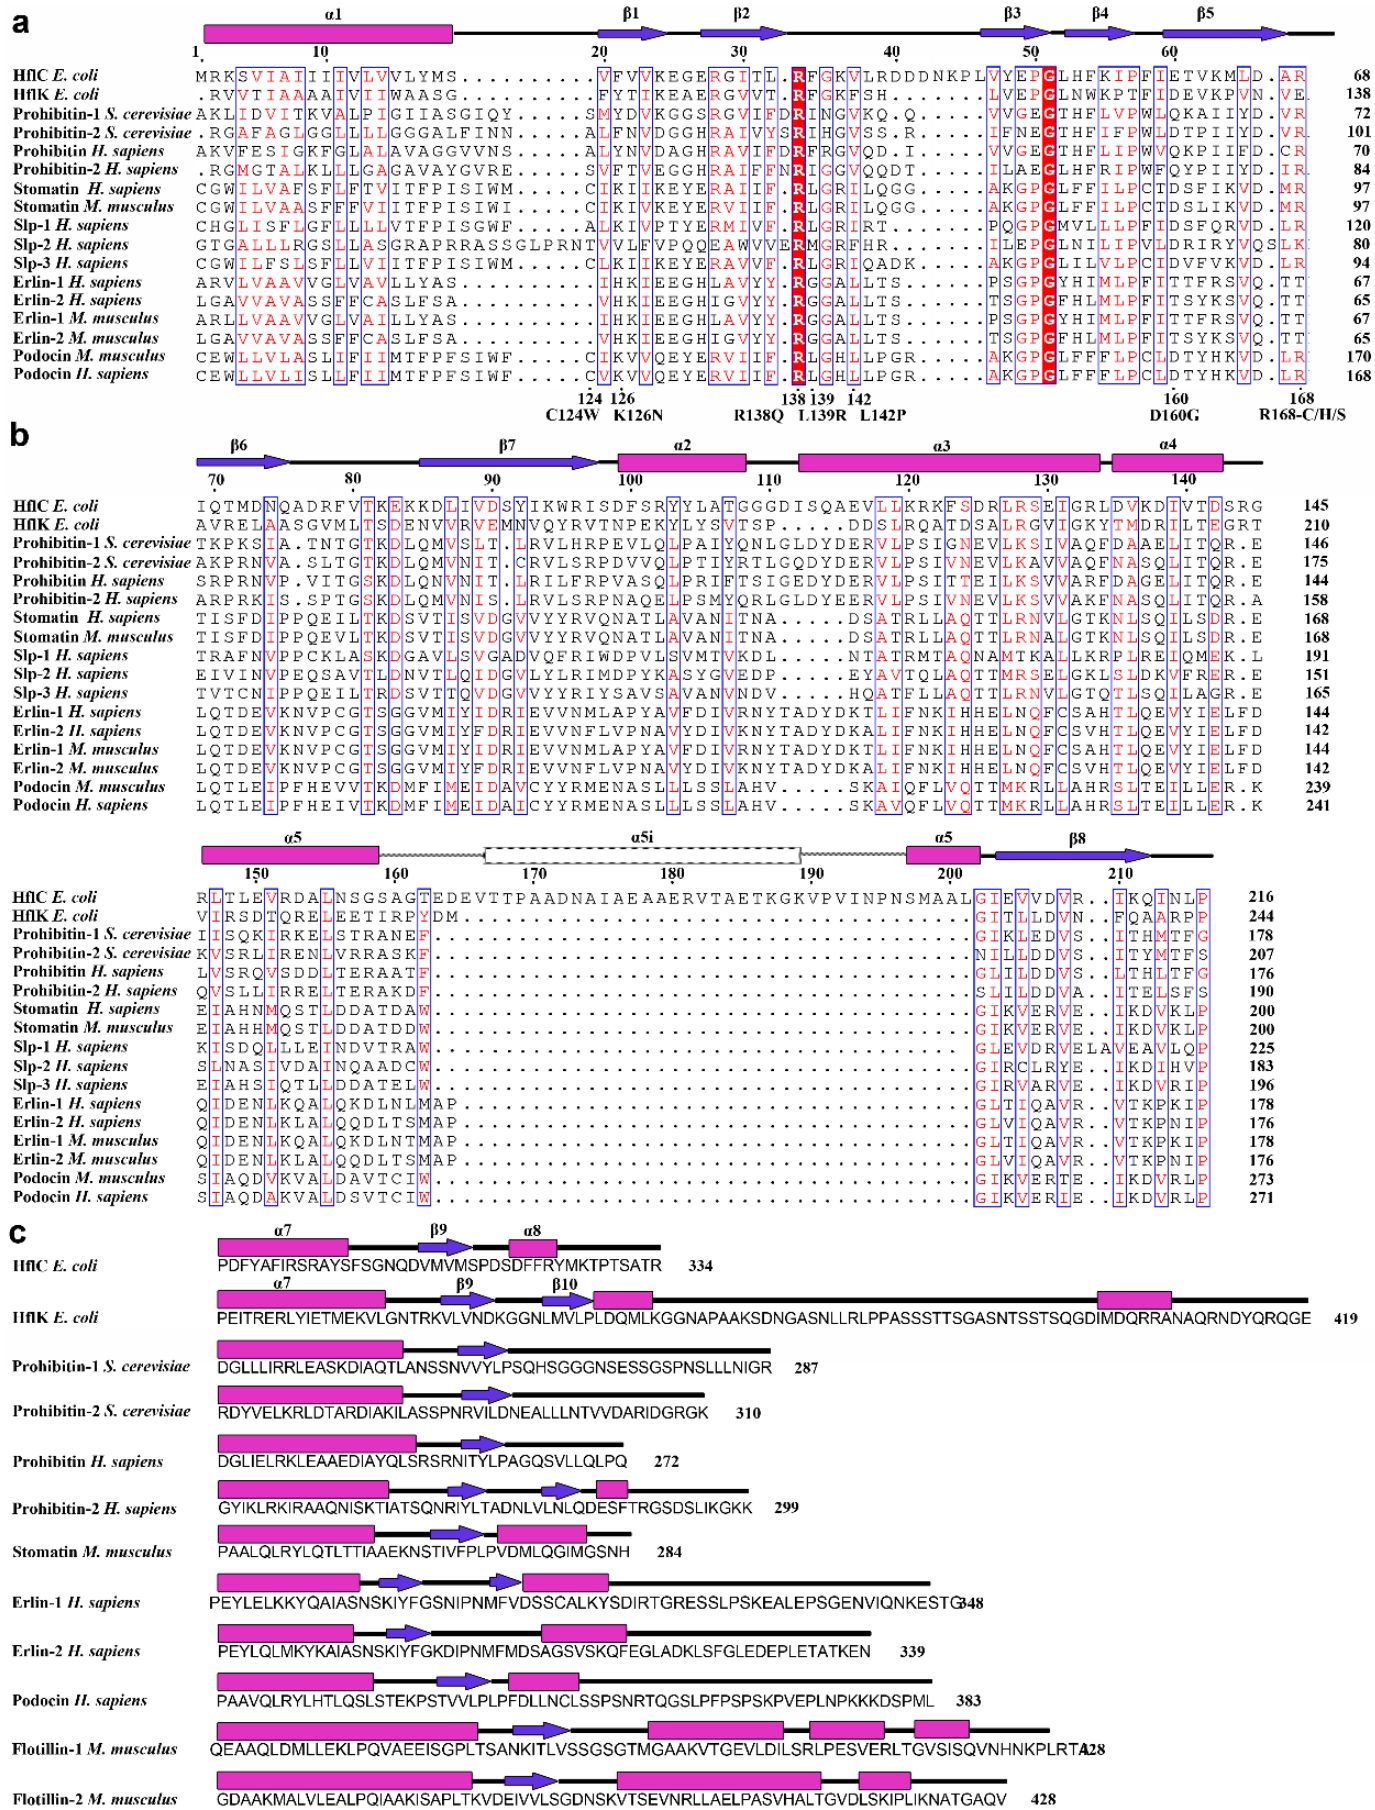

**Figure S6. Multiple sequence alignment of representative SPFH family members.**

**a** Sequence alignment of the N-terminal hydrophobic helices and the SPFH1 domains from different SPFH family members. **b** Sequence alignment of the SPFH2 domains from different SPFH family members. The secondary

structure motifs of HflC was labelled. **c** Domain organization of the C-terminal sequences of representative SPFH family members. The C-terminal sequences, starting from the predicted CC2 subdomains, of a few SPFH members including *E. coli* HflC and HflK, *S. cerevisiae* prohibitin-1 and prohibitin-2, *H. sapiens* prohibitin-1 and prohibitin-2, *M. musculus* stomatin, *H. sapiens* erlin-1 and erlin-2, *H. sapiens* podocin and *M. musculus* flotillin-1 and -2, are shown along with predicted secondary structures. A conserved feature is the presence of a  $\beta 9$  equivalent strand immediately after CC2 in the C-terminal sequences of all SPFH proteins.
