# Supplementary material
Source: PubMed Central journal article supplement (PMC8807802)
Supplement: 41422_2021_598_MOESM7_ESM.pdf [file 41422_2021_598_MOESM7_ESM.pdf]

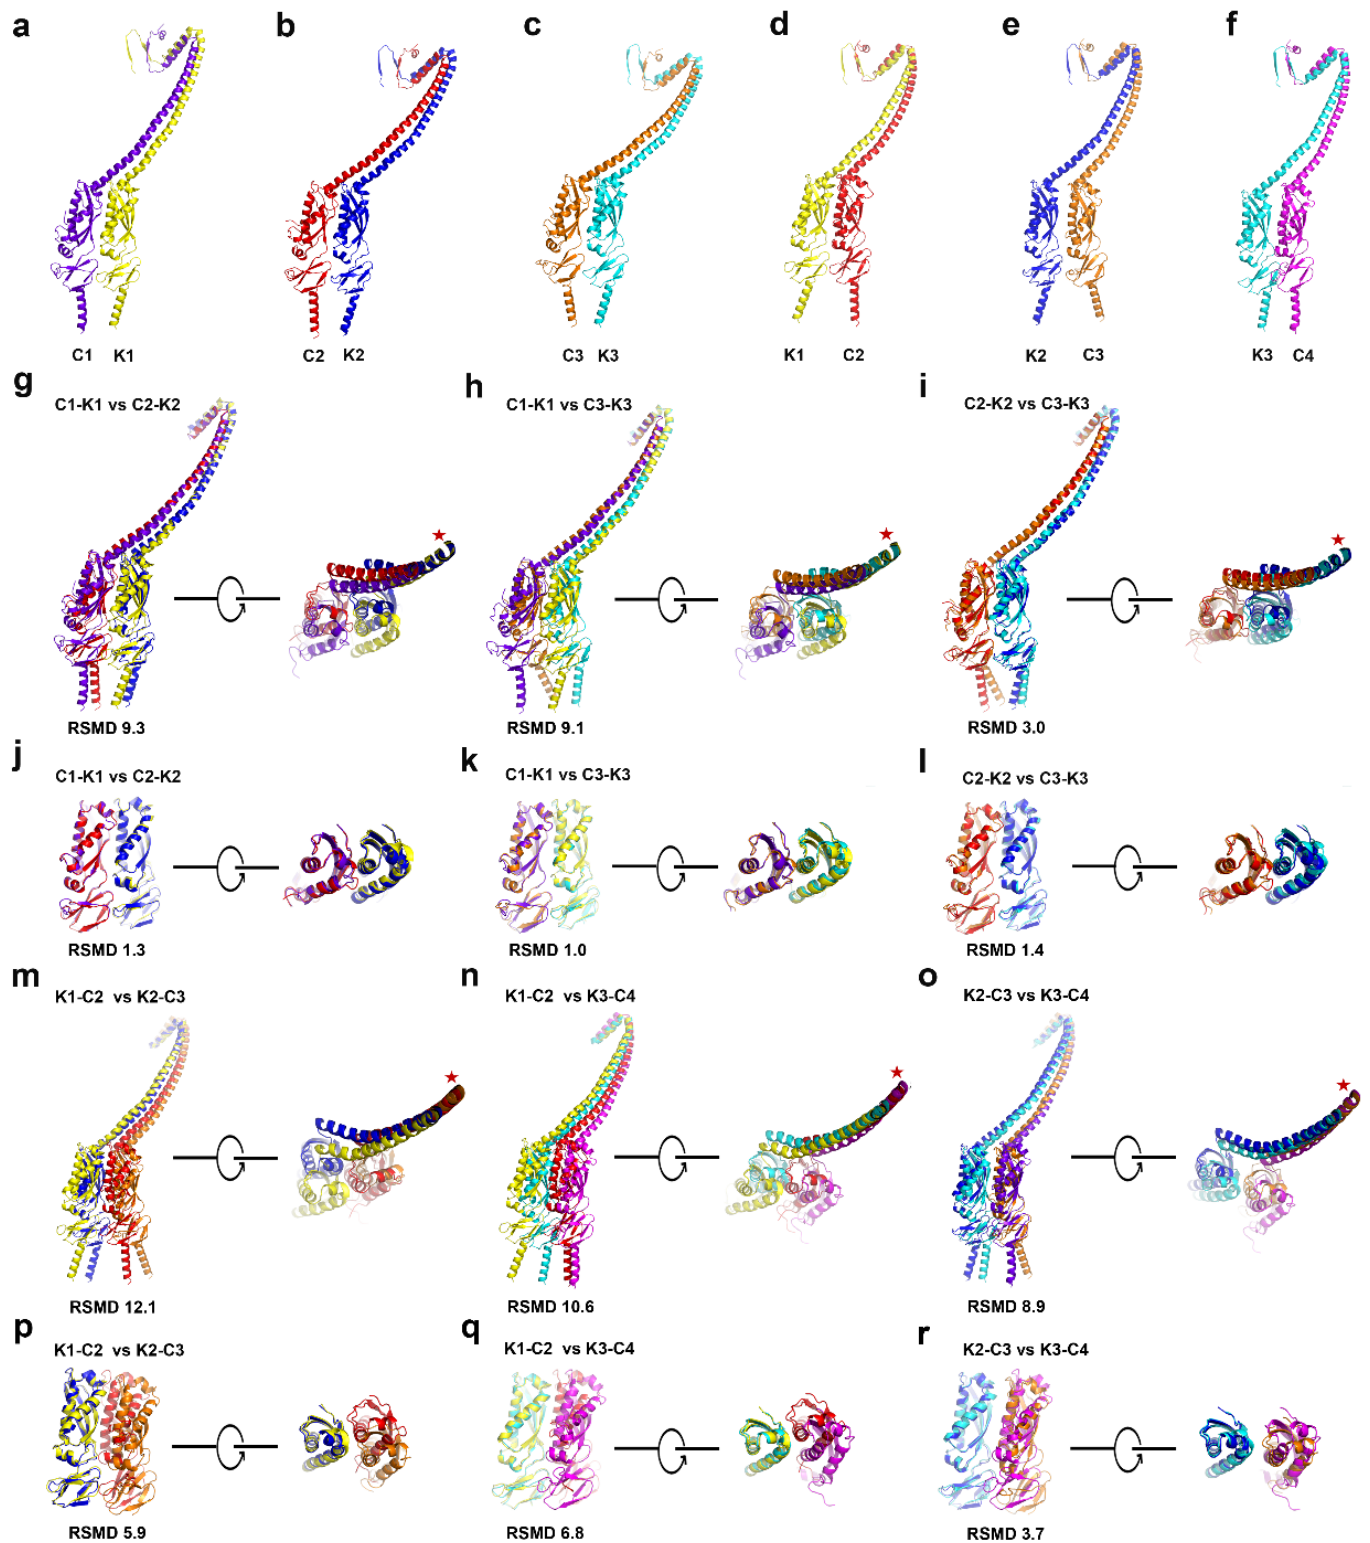

**Figure S7. Comparative analysis of different HflK-HflC interfaces.**

**a-f** Overview of the six different interfaces between HflK and HflC. **g-i** Pairwise comparison of the three C-K interfaces. Alignments were done using CC2 subdomains as reference for alignment. Calculated RMSD between the C1-K1 and C2-K2 (**g**), between the C1-K1 and C3-K3 (**h**) and between the C2-K2 and C3-K3 (**i**) pairs are labelled. **j-l** Pairwise comparison of the three C-K interfaces in the region of the SPFH domains. Alignments were done using the SPFH1 and SPFH2 domains of HflC in the two pairs as reference for alignment. Calculated RMSD of the SPFH1 and

SPFH2 domains of HflK and HflC between the C1-K1 and C2-K2 (**j**), between the C1-K1 and C3-K3 (**k**), and between the C2-K2 and C3-K3 (**l**) pairs are labelled. **m-o** Same as (**g-i**), but for the three K-C interfaces. **p-r** Same as (**j-l**), but for the three K-C interfaces.
