# Supplementary material
Source: PubMed Central journal article supplement (PMC8807802)
Supplement: 41422_2021_598_MOESM9_ESM.pdf [file 41422_2021_598_MOESM9_ESM.pdf]

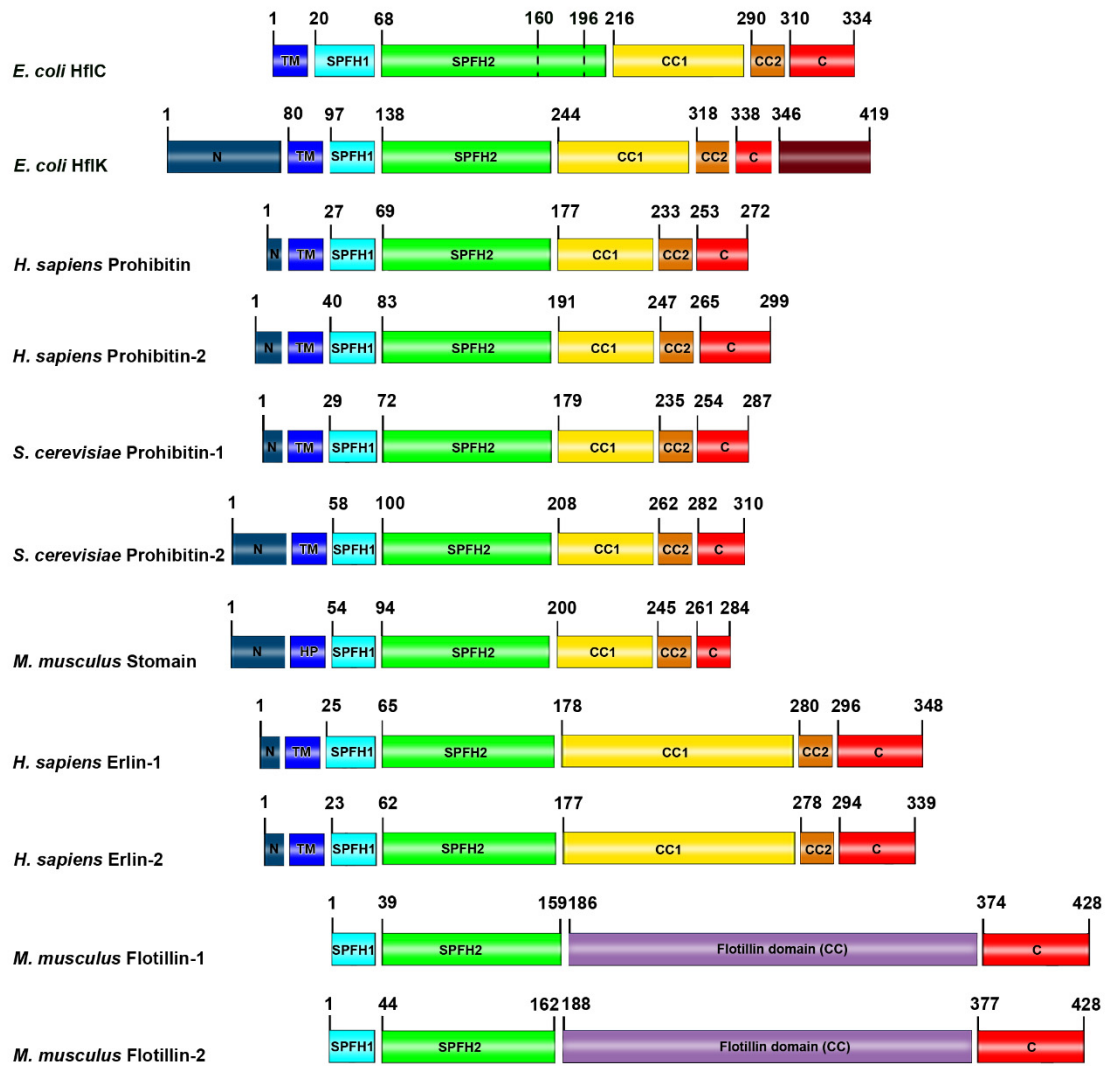

**Figure S9. Domain organization of SPFH family proteins.**

Domain organization of SPFH family proteins, including *E. coli* HflC and HflK, *H. sapiens* prohibitin-1 and -2, *S. cerevisiae* prohibitin-1 and -2, *M. musculus* stomatin, *H. sapiens* erlin-1 and -2, and *M. musculus* flotillin-1 and -2. The domain boundaries were estimated on the basis of secondary structure prediction. Note that flotillin domain is also a predicted coiled-coil.
