# Supplementary material
Source: PubMed Central journal article supplement (PMC8807802)
Supplement: 41422_2021_598_MOESM10_ESM.pdf [file 41422_2021_598_MOESM10_ESM.pdf]

**Table S1. Statistics of data collection and model validation.**

---

| <b>Data collection</b>                   |              |                              |
|------------------------------------------|--------------|------------------------------|
| Electron microscope                      | Titan Krios  | Titan Krios                  |
| Voltage (KV)                             | 300          | 300                          |
| Electron detector                        | K2           | K2                           |
| Magnification                            | 130,000X     | 130,000X                     |
| Electron dose (e-/Å <sup>2</sup> )       | ~60          | ~60                          |
| Pixel size (Å)                           | 1.057        | 1.057                        |
| Defocus range (µm)                       | -1.5 to -2.5 | -1.5 to -2.5                 |
| FSC threshold                            | 0.143        | 0.143                        |
| Total micrographs                        | 25,757       |                              |
| Final particle images (no.)              | 84,693       | 274,457 (symmetry expansion) |
| Symmetry imposed                         | C4           | C1                           |
| Map resolution (Å)                       | 3.3          | 3.5                          |
| <b>Refinement</b>                        |              |                              |
| Map sharpening B-factor(Å <sup>2</sup> ) | -30          | -50                          |
| Fourier shell correlation                | 0.143        | 0.143                        |
| Map resolution range (Å)                 | ~3-4.5 Å     | ~3-4.5 Å                     |
| <b>Model composition</b>                 |              |                              |
| Peptide chains                           |              | 12                           |
| Non-hydrogen atoms                       |              | 16,651                       |
| Residues                                 |              | 2076                         |
| <b>R.m.s. deviations</b>                 |              |                              |
| Bonds length (Å)                         |              | 0.005                        |
| Bonds angles (°)                         |              | 0.612                        |
| <b>Ramachandran plot</b>                 |              |                              |
| Favored (%)                              |              | 95.94                        |
| Outliers (%)                             |              | 0.00                         |
| Allowed (%)                              |              | 4.06                         |
| <b>Validation</b>                        |              |                              |
| Molprobit score                          |              | 2.34                         |
| Clashscore                               |              | 8.78                         |
| Poor rotamers (%)                        |              | 5.98                         |

---
